# Supplementary material
Source: MDPI journal article supplement (https://www.mdpi.com/1999-4907/8/3/81)
Supplement: s1 [file s1]

## Sheet: legend
Accession	for the accession code, 'W' is for walnut and the number is the collection code
Pop	geographic population
EAH	Eastern Alpine Highlands
WAH	Western Alpine Highlands
FP	Western Alpine Highlands
TK	Western Alpine Highlands
TNV	Western Alpine Highlands
GOOGLE long	longitude
GOOGLE lat	latitude
SSR	the two alleles of each SSR markers are listed in two subsequent columns
ctg	contig

## Sheet: walnut dataset
Accession	Pop	GOOGLE long	GOOGLE lat	WGA004		WGA009		WGA027		WGA069		WGA071		WGA072		WGA089		WGA118		WGA225		WGA321		WGA331		WGA349		WGA376		ctg-40		ctg-156		ctg-642		ctg-721		ctg-1528		ctg-1681		ctg-1692		GOOGLE long	GOOGLE lat
W001	WAH	13.1065	46.5367	247	249	256	264	225	229	180	182	226	228	158	160	235	239	216	216	215	221	256	260	292	292	282	282	274	274	241	241	332	332	281	289	391	391	173	176	223	229	227	227	13.1065	46.5367
W002	WAH	13.1131	46.5352	247	247	260	260	225	225	180	182	228	228	160	160	235	239	218	218	215	221	256	256	292	292	282	290	253	274	229	241	319	319	281	289	391	391	173	182	215	223	227	227	13.1131	46.5352
W003	WAH	13.1253	46.5325	247	249	256	256	229	229	180	196	226	226	160	160	235	239	216	218	209	221	256	256	292	296	290	293	266	274	241	241	319	332	281	289	391	391	173	173	223	223	227	227	13.1253	46.5325
W004	WAH	13.1249	46.5341	247	247	256	260	225	229	182	200	226	226	160	160	231	235	216	218	215	215	244	260	292	296	290	293	274	274	241	241	319	332	289	289	391	391	173	182	215	229	227	227	13.1249	46.5341
W005	WAH	13.126	46.5385	247	249	256	260	225	229	196	200	226	228	160	160	231	235	218	218	209	209	244	260	292	292	293	293	274	274	241	241	319	319	281	281	391	391	173	182	223	229	227	227	13.126	46.5385
W006	WAH	13.1262	46.5388	247	249	260	260	225	229	180	180	226	228	160	160	239	239	216	218	215	221	244	256	292	296	290	290	253	274	241	241	319	332	281	281	391	391	173	182	215	223	227	227	13.1262	46.5388
W007	WAH	13.1264	46.5386	247	249	256	256	229	229	182	196	228	228	158	160	231	239	216	218	209	221	256	260	296	296	293	293	261	274	229	229	319	319	281	289	391	391	173	176	215	215	227	227	13.1264	46.5386
W008	WAH	13.1247	46.5382	247	249	260	264	225	229	182	196	228	228	160	160	231	239	216	218	209	215	244	256	292	296	290	293	266	274	241	241	319	319	281	289	391	391	173	182	229	229	227	227	13.1247	46.5382
W009	WAH	13.0986	46.532	247	249	256	264	229	229	180	200	226	228	160	160	231	235	216	216	209	215	256	256	296	296	290	290	266	274	241	241	319	332	281	289	391	391	182	182	223	229	227	227	13.0986	46.532
W010	WAH	13.0752	46.5415	247	249	256	256	225	229	180	200	226	226	158	160	231	239	218	218	209	209	244	260	292	292	282	282	274	276	241	241	319	332	281	281	391	391	182	182	215	223	227	227	13.0752	46.5415
W011	WAH	13.0394	46.532	247	249	256	260	225	229	196	196	226	228	158	160	231	231	216	216	209	209	244	260	296	296	282	290	259	266	241	241	332	332	281	289	391	391	182	182	223	229	227	227	13.0394	46.532
W012	WAH	12.9987	46.5231	247	247	260	264	225	225	196	200	228	228	160	160	231	231	216	218	215	215	256	256	292	296	293	293	266	274	229	241	332	332	281	289	391	391	182	182	223	223	227	230	12.9987	46.5231
W013	WAH	12.9484	46.527	247	249	256	260	225	229	182	196	226	228	160	160	235	239	218	218	209	215	244	256	292	296	282	290	274	274	241	241	319	319	281	289	391	391	173	173	215	215	227	227	12.9484	46.527
W014	WAH	12.9258	46.5249	247	249	260	260	225	229	180	196	228	228	158	160	239	239	218	218	209	221	256	260	292	296	282	282	266	274	241	241	332	332	281	289	391	391	173	173	215	223	227	230	12.9258	46.5249
W015	WAH	12.9243	46.525	247	249	260	264	225	225	196	200	228	228	158	160	231	239	216	216	215	221	256	260	296	296	282	282	0	0	241	241	319	332	281	289	391	391	173	182	223	223	227	227	12.9243	46.525
W016	WAH	12.9315	46.5267	247	249	256	260	225	225	182	182	226	226	158	160	231	239	216	218	0	0	260	260	292	292	282	293	266	274	241	241	319	332	289	289	391	409	173	182	215	229	227	227	12.9315	46.5267
W017	WAH	12.9298	46.5265	247	249	260	264	225	225	196	196	228	228	158	160	231	231	216	218	209	215	244	260	296	296	293	293	259	274	229	241	332	332	281	289	391	391	173	182	223	229	227	227	12.9298	46.5265
W018	WAH	12.9295	46.5264	247	249	256	256	225	225	182	182	228	228	160	160	231	235	216	218	215	221	244	258	292	296	282	282	259	274	229	241	319	332	281	281	391	391	173	173	215	223	227	227	12.9295	46.5264
W019	WAH	12.9315	46.5274	247	249	260	260	225	225	196	196	226	226	160	160	231	239	216	218	209	221	244	256	292	296	282	282	266	266	241	241	319	332	289	289	391	391	182	182	215	229	227	227	12.9315	46.5274
W021	EAH	13.1875	46.4514	249	249	256	256	225	229	180	196	226	228	160	160	231	235	216	216	215	215	244	256	292	296	282	282	274	274	241	241	319	332	281	289	391	391	173	173	229	229	227	227	13.1875	46.4514
W022	EAH	13.1911	46.4638	249	249	256	260	229	229	182	182	226	228	160	160	231	235	216	218	209	215	256	256	292	296	282	290	253	259	241	241	332	332	281	281	391	391	173	182	215	223	227	227	13.1911	46.4638
W023	EAH	13.1918	46.4646	249	249	256	260	225	225	180	180	226	228	158	160	235	239	216	218	209	215	244	260	292	296	282	293	266	266	241	241	319	332	281	289	391	391	173	182	223	229	227	227	13.1918	46.4646
W024	EAH	13.1921	46.4685	249	249	256	260	225	229	196	200	226	228	160	160	231	235	216	216	209	215	260	260	292	296	290	293	259	274	229	241	319	332	289	289	391	391	182	182	223	229	227	227	13.1921	46.4685
W025	EAH	13.1927	46.4693	247	249	256	260	225	229	196	200	226	228	158	160	231	231	216	218	215	215	256	256	292	296	282	282	266	274	241	241	332	332	289	289	391	391	182	182	215	229	227	227	13.1927	46.4693
W026	EAH	13.196	46.469	247	249	260	260	225	229	180	196	226	226	158	158	235	235	216	216	209	215	256	256	292	292	290	290	274	274	241	241	319	332	289	289	391	391	182	182	223	229	227	227	13.196	46.469
W027	EAH	13.1924	46.4665	249	249	256	256	225	229	196	200	228	228	158	158	235	239	216	218	215	221	244	244	292	296	282	282	274	274	241	241	332	332	281	289	391	391	173	182	223	223	227	227	13.1924	46.4665
W028	EAH	13.3008	46.4817	249	249	256	264	225	225	180	196	228	228	160	160	235	235	216	218	209	215	256	260	292	292	282	282	274	274	241	241	319	332	281	289	391	391	182	182	215	229	227	227	13.3008	46.4817
W029	EAH	13.3026	46.5063	247	249	264	264	225	229	196	200	226	228	160	160	235	239	204	218	209	221	244	260	294	296	282	282	259	274	241	241	319	319	281	281	391	391	173	182	215	219	227	227	13.3026	46.5063
W030	EAH	13.4151	46.4998	247	249	256	260	229	229	196	200	228	228	160	160	231	239	216	218	209	215	256	260	296	296	282	282	253	266	229	241	319	332	281	289	391	391	182	182	229	229	227	227	13.4151	46.4998
W031	EAH	13.4541	46.5062	247	249	256	264	229	229	180	180	228	228	158	160	235	239	204	216	209	215	244	262	292	294	290	290	268	274	229	237	319	332	281	281	391	391	173	176	219	223	227	227	13.4541	46.5062
W032	EAH	13.4797	46.5096	247	249	264	264	225	229	180	196	228	228	158	160	231	239	216	218	209	215	244	256	292	292	293	293	274	274	241	241	319	332	289	289	391	391	182	182	229	229	227	227	13.4797	46.5096
W034	EAH	13.6418	46.4957	249	249	256	260	225	225	180	182	226	226	158	160	239	239	204	218	209	209	244	256	292	296	282	293	266	274	229	241	319	319	281	281	391	391	182	182	215	223	227	227	13.6418	46.4957
W035	EAH	13.4642	46.5112	247	249	256	256	225	225	180	200	226	228	160	160	235	235	218	218	215	221	256	256	292	296	282	290	266	274	241	241	332	332	289	289	391	391	182	182	215	229	227	227	13.4642	46.5112
W036	WAH	12.7792	46.585	247	249	260	260	229	229	200	200	228	228	160	160	235	235	216	218	209	209	260	260	292	292	282	282	253	266	241	241	332	332	289	289	391	391	173	182	223	223	227	227	12.7792	46.585
W037	WAH	12.7789	46.585	247	249	256	260	225	229	196	200	226	226	160	160	235	235	216	218	209	209	244	244	292	296	282	290	0	0	229	241	332	332	289	289	391	391	182	182	215	223	227	227	12.7789	46.585
W038	WAH	12.7844	46.5858	247	249	256	256	225	229	190	200	226	228	160	160	231	239	216	216	209	215	244	260	292	296	290	290	259	274	241	241	319	332	281	281	391	391	182	182	215	215	227	227	12.7844	46.5858
W039	WAH	12.785	46.585	249	249	256	256	225	229	196	200	226	228	158	160	239	239	216	216	209	215	256	260	292	296	282	282	0	0	229	241	332	332	281	289	391	391	173	182	215	215	227	227	12.785	46.585
W040	WAH	12.8506	46.5561	249	249	256	260	225	229	196	200	226	226	160	160	231	231	216	218	209	209	260	260	292	292	290	290	266	274	241	241	319	332	281	289	391	391	182	182	223	229	227	227	12.8506	46.5561
W041	WAH	12.8519	46.5547	247	249	256	260	225	229	200	200	226	226	160	160	231	239	204	218	215	221	256	260	292	292	290	293	253	253	241	241	332	332	281	289	391	391	182	182	215	223	227	227	12.8519	46.5547
W042	WAH	12.8517	46.5556	247	249	256	264	225	225	180	196	226	228	158	160	235	239	216	218	209	209	244	260	296	296	282	293	253	274	241	241	319	319	281	289	391	391	173	173	223	229	227	227	12.8517	46.5556
W043	WAH	12.8608	46.5447	247	249	256	256	225	225	182	200	226	228	160	160	239	239	204	216	215	215	256	260	292	292	282	293	259	266	229	241	319	332	281	289	391	391	173	182	223	223	227	227	12.8608	46.5447
W044	WAH	12.8742	46.5164	247	249	260	264	225	225	180	182	226	228	160	160	231	235	216	216	221	221	244	260	292	296	282	282	253	274	229	241	332	332	289	289	391	391	173	182	223	223	227	227	12.8742	46.5164
W045	WAH	12.8742	46.5167	247	249	260	264	225	225	182	196	226	228	160	160	239	239	216	216	209	215	256	260	292	296	282	293	266	266	241	241	332	332	289	289	391	391	173	182	223	229	227	227	12.8742	46.5167
W046	WAH	12.7669	46.5233	247	249	256	260	225	229	180	196	226	226	160	160	239	239	216	218	209	215	256	260	296	298	290	293	274	274	241	241	319	319	281	289	391	391	173	182	223	223	227	230	12.7669	46.5233
W047	WAH	12.7681	46.5231	247	249	256	264	225	225	196	196	228	228	158	158	239	239	216	218	209	209	256	260	292	296	282	282	253	259	229	241	332	332	281	289	391	391	182	182	215	223	227	227	12.7681	46.5231
W048	WAH	12.8058	46.5214	247	249	260	260	225	229	180	180	228	228	160	160	231	239	216	216	215	221	256	260	292	296	290	290	274	274	241	241	319	332	281	289	391	391	173	182	215	223	227	227	12.8058	46.5214
W049	WAH	12.8372	46.5147	247	249	260	264	225	225	196	200	226	228	158	160	231	235	204	216	215	215	260	260	292	296	290	293	274	274	229	241	319	332	281	289	391	409	173	182	223	223	227	227	12.8372	46.5147
W050	WAH	12.8594	46.5031	247	249	260	260	225	229	180	182	226	228	158	158	231	239	216	218	215	221	260	260	292	296	282	282	253	274	241	241	332	332	281	289	391	391	176	176	223	223	227	227	12.8594	46.5031
W051	WAH	12.8597	46.5031	247	249	260	264	225	229	180	182	228	228	158	160	235	239	216	216	209	215	256	260	292	296	282	282	274	274	229	241	319	319	281	281	391	391	173	182	223	229	227	227	12.8597	46.5031
W052	WAH	12.8644	46.4735	247	249	260	260	225	225	200	200	228	228	160	160	231	231	216	218	209	209	244	244	292	292	282	293	274	274	241	241	319	319	281	289	391	391	173	182	223	223	227	227	12.8644	46.4735
W053	WAH	12.9465	46.4121	247	249	256	260	225	225	180	200	226	226	158	158	235	239	216	218	215	221	244	256	292	292	282	293	274	274	241	241	319	332	281	289	391	391	173	182	223	223	227	227	12.9465	46.4121
W054	WAH	12.9465	46.4122	247	249	256	264	229	229	180	200	228	228	160	160	235	235	216	218	209	209	256	256	292	296	282	282	274	274	229	229	319	332	289	289	391	391	173	176	215	223	227	227	12.9465	46.4122
W055	FP	13.2524	46.147	247	249	256	260	229	229	200	200	228	228	158	160	231	239	216	218	209	209	244	260	292	296	282	293	266	274	241	241	319	332	281	281	391	391	182	182	223	223	227	227	13.2524	46.147
W056	FP	13.2428	46.0951	247	249	260	264	0	0	182	182	228	228	158	160	231	231	216	218	209	221	256	256	292	292	282	290	253	259	229	241	332	332	281	281	391	391	173	173	215	215	227	227	13.2428	46.0951
W057	FP	13.1185	46.0275	249	249	256	264	225	229	180	180	228	228	160	160	231	235	216	218	215	215	256	260	292	292	291	291	274	274	241	241	319	319	281	289	391	391	173	176	223	229	227	230	13.1185	46.0275
W058	WAH	12.9967	46.4057	249	249	256	256	229	229	180	200	226	228	160	160	235	239	218	218	209	221	244	256	292	296	293	293	274	274	241	241	332	332	281	281	391	391	173	182	215	223	227	227	12.9967	46.4057
W059	WAH	12.8903	46.4038	247	249	256	264	225	229	196	196	226	226	158	160	239	239	216	218	215	215	256	262	292	292	0	0	274	274	241	241	319	332	281	281	391	391	182	182	215	223	227	227	12.8903	46.4038
W060	WAH	12.8761	46.4115	247	247	256	264	225	229	180	200	226	228	158	160	235	239	218	218	215	221	256	260	292	296	290	290	259	274	229	241	332	332	281	289	391	391	173	182	215	223	227	227	12.8761	46.4115
W061	WAH	12.8744	46.4103	247	249	256	260	229	229	196	200	228	228	158	160	231	231	218	218	209	215	244	256	292	296	282	282	253	274	241	241	319	332	289	289	391	391	182	182	223	223	227	227	12.8744	46.4103
W062	WAH	12.8217	46.4076	247	249	256	260	225	229	200	200	226	228	158	160	239	239	218	218	215	221	244	256	292	296	282	282	274	274	241	241	319	332	289	289	391	391	182	182	215	223	227	227	12.8217	46.4076
W063	WAH	12.8969	46.4256	249	249	256	260	225	229	180	196	226	226	158	158	231	231	216	216	209	209	244	256	292	292	293	293	0	0	229	241	332	332	289	289	391	391	182	182	215	223	227	230	12.8969	46.4256
W064	WAH	12.9097	46.4256	247	249	256	264	225	225	200	200	226	228	160	160	235	239	216	216	215	215	256	260	292	292	293	293	274	274	241	241	319	319	281	281	391	391	173	182	223	229	227	227	12.9097	46.4256
W065	WAH	12.6836	46.5592	247	249	260	260	225	229	180	180	226	228	160	160	231	235	216	218	215	221	244	260	292	292	289	293	266	266	241	241	319	332	289	289	391	391	173	173	215	215	227	227	12.6836	46.5592
W066	WAH	12.5864	46.4168	247	247	256	256	225	225	180	190	228	228	158	158	231	235	216	218	209	215	244	256	292	292	282	282	266	274	241	241	319	332	289	289	391	391	173	173	215	223	227	227	12.5864	46.4168
W067	WAH	12.6	46.4124	247	247	264	264	225	225	0	0	226	228	160	160	235	239	216	216	215	215	256	260	292	296	282	293	274	274	241	241	332	332	289	289	391	391	173	173	215	215	227	227	12.6	46.4124
W068	WAH	12.7685	46.4141	249	249	256	260	225	229	180	200	226	226	158	160	237	239	216	216	215	221	256	256	292	296	282	282	274	274	241	241	332	332	281	281	391	391	173	182	215	223	227	227	12.7685	46.4141
W070	WAH	12.9831	46.4386	247	249	256	260	225	229	200	200	226	228	158	160	231	235	204	218	215	215	244	256	292	292	293	293	259	266	241	241	332	332	289	289	391	391	182	182	223	229	227	227	12.9831	46.4386
W071	FP	13.295	45.9299	247	249	256	260	225	225	196	200	226	226	158	160	231	235	216	226	209	215	244	256	292	296	293	293	274	274	241	241	319	332	289	289	391	391	173	182	223	223	227	227	13.295	45.9299
W072	FP	13.3683	45.8229	249	249	260	264	229	229	180	196	226	228	158	160	235	239	216	218	209	221	256	260	292	296	293	293	266	266	241	241	319	319	281	289	391	409	173	182	223	229	227	230	13.3683	45.8229
W073	TK	13.7876	45.6912	247	249	260	264	225	229	200	200	228	228	160	160	231	231	216	218	209	215	256	260	296	296	282	282	274	274	241	241	319	332	281	289	391	391	173	176	229	229	227	227	13.7876	45.6912
W074	TK	13.7432	45.5989	249	249	256	256	225	229	180	182	228	228	160	160	231	231	204	204	215	215	260	260	292	296	282	289	257	274	229	241	319	319	281	289	391	391	173	173	215	223	227	227	13.7432	45.5989
W075	TK	13.64	45.7698	247	249	256	260	225	229	182	200	0	0	160	160	235	239	216	218	215	221	256	260	292	296	282	282	274	274	229	241	319	332	281	281	391	391	176	182	223	229	227	227	13.64	45.7698
W076	TK	13.5789	45.8231	249	249	256	260	225	229	182	196	226	228	158	160	239	239	204	218	209	221	244	260	292	296	282	282	274	274	229	241	319	332	281	289	391	391	176	182	223	229	227	227	13.5789	45.8231
W077	FP	13.4969	45.9086	247	247	256	256	229	229	180	200	226	228	158	160	235	235	216	218	209	215	244	256	292	296	282	289	266	266	229	241	319	319	281	289	391	391	176	182	223	223	227	227	13.4969	45.9086
W078	FP	13.4554	45.953	249	249	256	260	225	225	196	200	228	228	160	160	231	231	218	218	215	221	260	260	292	296	282	289	253	274	241	241	332	332	281	289	391	391	173	182	223	229	227	227	13.4554	45.953
W079	FP	13.3318	46.0082	247	249	256	264	225	225	196	200	228	228	158	158	231	235	216	218	209	215	244	244	292	296	293	293	274	274	229	241	332	332	281	289	391	391	173	176	223	223	227	227	13.3318	46.0082
W080	FP	13.2261	46.0315	247	249	260	264	225	225	182	182	226	226	160	160	231	235	216	216	209	209	244	256	292	296	282	282	274	274	229	241	319	332	289	289	391	391	182	182	223	229	227	227	13.2261	46.0315
W081	FP	13.2114	46.0963	247	247	260	260	225	225	180	200	226	228	160	160	235	239	216	218	215	215	260	260	292	292	293	293	266	274	229	241	332	332	281	289	391	391	182	182	223	223	227	227	13.2114	46.0963
W082	FP	13.0953	46.1157	249	249	256	260	225	229	180	200	226	226	158	160	231	239	204	216	209	215	256	256	292	292	282	293	274	274	241	241	332	332	281	289	391	391	173	173	223	223	227	227	13.0953	46.1157
W083	WAH	13.0052	46.5201	247	249	256	256	225	229	180	196	0	0	158	160	235	239	218	218	215	215	244	260	292	296	282	289	274	274	241	241	319	319	281	289	391	391	173	173	215	223	227	227	13.0052	46.5201
W084	WAH	13.0265	46.4628	249	249	256	260	225	229	180	180	228	228	158	160	235	235	216	216	209	215	244	260	292	296	290	290	274	274	241	241	332	332	289	289	391	391	176	182	223	223	227	227	13.0265	46.4628
W085	WAH	12.8976	46.44	247	249	256	260	225	225	182	200	0	0	160	160	235	239	216	218	221	221	256	256	292	292	293	293	266	274	241	241	319	319	289	289	391	391	173	182	223	223	227	227	12.8976	46.44
W086	FP	13.1837	46.0785	247	249	256	260	225	229	180	200	226	226	160	160	231	235	216	218	215	215	260	260	292	292	282	282	261	274	241	241	332	332	281	281	391	409	173	182	215	229	227	227	13.1837	46.0785
W087	FP	13.0524	46.0883	249	249	260	260	225	225	180	200	226	228	160	160	231	235	218	218	209	215	256	256	292	292	282	289	266	274	229	229	332	332	289	289	391	391	173	182	223	223	227	230	13.0524	46.0883
W088	WAH	12.798	46.1638	249	249	260	260	229	229	180	200	226	226	160	160	235	239	216	218	215	221	256	260	296	296	282	289	259	266	241	241	332	332	289	289	391	391	176	182	229	229	227	227	12.798	46.1638
W089	WAH	12.438	46.2863	249	249	256	256	229	229	196	200	226	228	158	160	231	239	216	218	209	209	244	256	292	292	289	289	274	274	241	241	332	332	289	289	391	391	176	182	215	223	227	227	12.438	46.2863
W090	WAH	12.4373	46.2882	249	249	256	256	225	229	182	190	228	228	158	160	231	235	218	218	209	221	244	256	292	292	282	293	253	266	241	241	319	332	281	281	391	391	173	176	223	223	227	227	12.4373	46.2882
W091	WAH	12.5166	46.2684	249	249	256	256	225	229	196	200	0	0	158	158	231	235	216	216	209	221	244	256	292	292	289	289	253	253	229	241	332	332	289	289	391	391	173	182	223	223	227	230	12.5166	46.2684
W092	WAH	12.476	46.2441	247	249	256	264	225	229	196	196	226	226	158	160	235	239	216	218	209	209	244	262	292	296	282	293	266	274	241	241	319	319	281	281	391	391	173	182	223	223	227	227	12.476	46.2441
W093	WAH	12.5212	46.2007	247	249	256	260	229	229	190	200	226	228	160	160	231	239	216	216	209	215	256	256	296	296	289	293	266	274	229	229	319	319	281	281	391	391	173	182	223	223	227	227	12.5212	46.2007
W094	WAH	12.573	46.1916	249	249	256	264	229	229	182	196	228	228	160	160	231	239	216	218	209	209	256	260	292	296	282	282	274	274	241	241	319	332	281	289	391	391	182	182	223	229	227	227	12.573	46.1916
W095	WAH	12.664	46.1581	249	249	256	264	225	229	196	200	226	226	160	160	235	235	216	216	215	215	256	256	292	292	282	282	274	274	229	241	332	332	289	289	391	391	173	173	223	229	227	227	12.664	46.1581
W096	WAH	12.7911	46.2166	247	249	256	260	229	229	196	196	226	226	160	160	231	235	218	220	215	215	244	244	296	296	282	282	266	274	229	229	332	332	281	289	391	391	173	182	223	229	227	227	12.7911	46.2166
W097	WAH	12.6582	46.1315	247	247	256	256	225	229	180	180	226	228	160	160	235	239	216	218	215	215	244	260	292	292	282	293	274	274	241	241	332	332	289	289	391	391	182	182	223	229	227	227	12.6582	46.1315
W098	FP	12.628	46.073	247	247	260	264	225	229	180	196	226	228	158	158	235	235	218	218	221	221	256	260	292	296	282	282	266	274	241	241	319	319	281	289	391	391	173	173	229	229	227	227	12.628	46.073
W100	FP	12.679	46.0565	247	249	256	264	225	229	180	180	0	0	158	158	235	239	216	216	209	215	244	260	292	292	282	282	261	274	229	241	319	332	289	289	391	391	173	182	215	215	227	227	12.679	46.0565
W101	FP	12.8915	45.9644	249	249	256	260	225	229	180	200	226	228	160	160	235	235	216	218	209	221	244	256	292	296	293	293	253	274	229	241	319	332	281	281	391	391	182	182	223	229	227	227	12.8915	45.9644
W102	FP	13.1432	46.031	247	247	256	256	225	229	196	196	226	228	158	160	231	239	218	218	215	215	244	260	292	296	282	293	274	274	241	241	319	319	281	289	391	391	182	182	215	223	227	227	13.1432	46.031
W103	FP	13.3163	46.0701	249	249	260	260	225	225	196	200	226	228	0	0	231	235	216	218	0	0	256	256	292	292	289	289	253	259	241	241	319	332	289	289	391	391	182	182	223	229	227	227	13.3163	46.0701
W104	TNV	13.4721	46.11	247	249	256	256	225	225	0	0	226	228	158	158	235	239	204	222	221	221	244	260	292	296	282	282	253	274	241	241	319	332	289	289	391	409	173	173	215	229	227	227	13.4721	46.11
W105	TNV	13.5173	46.1325	247	249	256	256	225	229	180	180	226	228	158	160	231	231	218	218	221	221	244	260	296	296	282	293	253	274	229	241	319	332	281	281	391	391	173	182	215	223	227	227	13.5173	46.1325
W106	TNV	13.442	46.1407	247	249	256	264	225	229	180	196	226	228	158	160	235	239	204	218	209	209	256	260	292	292	282	293	259	274	241	241	319	332	289	289	391	391	182	182	223	229	227	227	13.442	46.1407
W107	WAH	13.0356	46.3511	247	249	256	260	225	225	180	180	226	228	160	160	231	239	218	218	215	221	256	260	292	296	282	282	259	274	229	241	319	332	281	289	391	391	176	182	223	223	227	227	13.0356	46.3511
W108	WAH	12.8963	46.2373	247	249	256	264	225	229	180	180	228	228	160	160	231	239	218	218	209	209	244	260	292	292	282	293	266	274	241	241	332	332	289	289	391	391	173	176	229	229	227	227	12.8963	46.2373
W109	WAH	12.8813	46.2481	247	247	256	260	225	225	180	180	226	228	158	160	231	231	216	216	209	215	244	256	292	292	282	293	253	266	241	241	319	332	281	281	391	391	173	182	215	223	227	227	12.8813	46.2481
W110	WAH	12.7161	46.2045	247	249	256	256	225	225	182	196	226	228	158	160	235	235	204	216	209	221	260	260	292	292	282	293	0	0	241	241	332	332	289	289	391	391	173	173	215	215	227	227	12.7161	46.2045
W111	WAH	12.7161	46.2	247	249	260	260	225	225	180	180	226	226	160	160	231	239	216	216	209	215	256	258	292	296	282	289	274	274	241	241	332	332	281	289	391	391	173	182	215	229	227	227	12.7161	46.2
W112	WAH	12.8956	46.1638	247	249	260	260	225	229	200	200	226	228	160	160	235	235	216	216	209	221	256	260	296	296	289	293	274	276	229	229	319	319	281	289	391	391	173	173	223	223	227	227	12.8956	46.1638
W113	FP	12.9365	46.0845	247	249	260	264	225	229	182	196	226	228	158	160	231	235	204	216	221	221	256	260	292	292	293	293	274	274	241	241	319	319	281	289	391	391	182	182	223	229	227	227	12.9365	46.0845
W114	FP	13.1384	46.0125	247	249	256	260	225	225	180	200	226	226	158	158	235	239	216	218	215	215	256	260	292	296	289	289	274	274	229	241	332	332	281	281	391	391	173	176	215	229	227	227	13.1384	46.0125
W115	FP	13.1432	46.004	247	249	256	256	225	229	180	200	226	228	160	160	231	235	204	218	209	215	244	256	292	292	293	293	259	259	241	241	332	332	289	289	391	391	173	182	215	223	227	227	13.1432	46.004
W116	FP	13.094	45.9603	247	249	260	260	225	229	180	196	226	228	158	160	235	239	204	204	209	209	256	260	292	292	293	293	253	253	229	237	319	332	281	281	391	391	173	173	215	219	227	227	13.094	45.9603
W117	FP	13.0513	45.9384	249	249	260	260	225	225	180	200	224	224	158	160	231	239	216	218	209	221	256	260	292	296	282	282	274	274	241	241	319	332	281	289	391	391	173	182	215	215	227	227	13.0513	45.9384
W118	FP	13.0044	45.8933	247	247	264	264	229	229	180	200	226	226	158	160	235	239	216	216	209	221	260	260	292	296	293	293	274	274	241	241	319	319	281	281	391	391	173	182	223	229	227	230	13.0044	45.8933
W119	FP	13.0104	45.8766	247	249	256	260	225	225	200	200	226	226	158	160	231	239	216	218	215	215	256	260	292	296	282	282	259	274	229	241	319	332	281	289	391	391	182	182	215	215	227	227	13.0104	45.8766
W120	FP	12.9549	45.8572	247	249	256	264	225	229	200	200	228	228	158	160	231	239	204	216	215	221	244	244	296	296	293	293	266	274	241	241	332	332	281	289	391	391	182	182	223	223	227	227	12.9549	45.8572
W121	FP	12.9988	45.7699	249	249	260	264	229	229	180	180	226	228	158	160	235	235	216	218	209	221	244	256	292	292	282	282	274	274	241	241	332	332	281	289	391	391	173	182	223	229	227	227	12.9988	45.7699
W122	FP	13.0981	45.6817	249	249	260	260	225	225	182	200	226	228	160	160	239	239	216	216	209	209	256	256	292	296	293	293	266	274	241	241	332	332	281	289	391	391	173	173	223	223	227	227	13.0981	45.6817
W123	FP	13.0262	45.7671	247	249	256	264	225	225	196	200	228	228	158	160	231	235	218	218	209	209	244	256	292	296	282	293	253	266	241	241	332	332	289	289	391	391	173	173	223	223	227	227	13.0262	45.7671
W124	FP	13.079	45.8133	247	249	256	260	225	229	182	196	226	226	150	150	231	235	204	216	209	215	256	256	292	292	282	282	259	259	241	241	319	319	281	289	391	391	173	182	223	223	227	227	13.079	45.8133
W125	FP	13.1266	45.9372	247	249	256	260	225	229	180	180	226	228	158	160	231	235	204	204	209	215	256	256	296	296	0	0	274	274	229	241	319	319	281	289	391	409	173	173	223	229	227	227	13.1266	45.9372
W126	FP	13.1274	45.9369	249	249	256	260	225	225	180	182	228	228	158	160	231	235	216	216	209	221	256	256	292	296	289	293	266	274	241	241	319	332	289	289	391	391	173	182	215	223	227	227	13.1274	45.9369
W127	FP	13.1464	45.8677	247	249	256	264	225	225	180	182	228	228	158	158	235	239	216	218	209	209	256	260	292	296	282	282	274	274	229	241	319	332	289	289	391	391	182	182	215	223	227	227	13.1464	45.8677
W128	FP	13.1813	45.9498	249	249	260	260	225	229	182	200	226	228	158	160	231	235	204	216	215	215	244	244	292	296	282	282	274	274	241	241	319	332	281	289	391	409	173	173	215	223	227	227	13.1813	45.9498
W129	FP	12.9993	45.9597	247	249	256	264	225	229	180	180	226	228	158	160	231	235	218	218	215	215	244	260	296	296	282	284	274	274	229	241	319	319	281	289	391	391	173	182	215	215	227	227	12.9993	45.9597
W130	FP	12.9953	45.9595	249	249	256	260	225	229	180	182	226	228	158	160	231	239	216	218	209	215	244	260	292	292	289	293	253	266	241	241	319	332	281	289	391	391	173	182	223	229	227	227	12.9953	45.9595
W131	FP	12.9956	45.9597	247	249	256	256	225	225	180	180	226	228	158	158	235	239	216	218	209	209	256	260	292	296	282	289	266	274	229	241	319	319	281	289	391	391	182	182	223	223	227	227	12.9956	45.9597
W132	FP	12.9959	45.9596	249	249	256	260	225	229	180	180	226	228	158	160	231	239	216	218	209	215	244	260	292	296	293	293	274	274	229	241	319	332	281	289	391	391	173	182	223	229	227	227	12.9959	45.9596
W133	FP	12.9964	45.9592	249	249	256	256	225	229	182	200	226	226	158	160	239	239	216	218	209	215	256	262	292	292	289	289	266	274	241	241	319	332	281	289	391	391	173	182	223	229	227	227	12.9964	45.9592
W134	FP	13.0561	45.8766	249	249	256	256	225	229	180	196	226	228	160	160	231	231	218	218	209	215	256	260	296	296	282	282	274	274	241	241	319	332	289	289	391	391	182	182	215	229	227	227	13.0561	45.8766
W135	TNV	13.4173	46.1017	247	249	256	256	225	229	180	200	226	228	158	158	231	239	216	218	215	215	244	256	292	296	282	282	266	266	229	241	319	319	289	289	391	391	173	182	223	229	227	227	13.4173	46.1017
W136	TNV	13.4298	46.1718	247	249	260	260	225	229	182	200	226	228	158	158	231	239	216	216	209	215	244	258	292	292	282	282	253	253	241	241	319	332	281	289	391	391	173	182	215	223	227	227	13.4298	46.1718
W137	TNV	13.4355	46.1516	247	249	260	260	225	229	200	200	226	226	158	160	231	231	216	218	209	221	256	260	292	296	289	289	253	261	241	241	319	332	281	289	391	391	173	182	223	229	227	227	13.4355	46.1516
W138	EAH	13.2896	46.3768	247	249	256	260	225	229	180	180	226	228	160	160	231	239	216	218	209	221	244	260	292	296	293	293	274	274	229	241	319	332	281	281	391	391	173	182	215	223	227	227	13.2896	46.3768
W139	EAH	13.3049	46.374	247	249	260	260	225	229	200	200	226	228	160	160	231	235	216	218	209	221	244	244	292	292	289	293	259	274	229	241	332	332	281	289	391	391	173	182	215	229	227	227	13.3049	46.374
W140	EAH	13.3288	46.3644	247	249	256	260	225	229	182	200	228	228	160	160	231	239	216	216	221	221	244	260	292	296	282	293	259	266	229	241	332	332	289	289	391	391	173	173	215	229	227	227	13.3288	46.3644
W141	EAH	13.301	46.3678	249	249	260	260	225	225	198	200	226	228	160	160	231	231	216	216	0	0	244	244	292	292	282	293	274	274	241	241	319	332	289	289	391	391	182	182	215	215	227	227	13.301	46.3678
W142	EAH	13.1188	46.3011	247	249	256	260	225	229	180	200	226	228	160	160	235	239	218	218	215	215	256	260	292	292	282	293	274	274	229	241	319	319	281	281	391	391	173	182	215	229	227	227	13.1188	46.3011
W143	EAH	13.121	46.28	247	247	264	264	225	225	182	200	226	228	158	160	231	235	216	218	209	215	258	260	292	292	289	289	274	274	229	241	332	332	281	281	391	391	173	173	215	223	227	227	13.121	46.28
W144	EAH	13.1419	46.2749	247	247	260	260	229	229	200	200	226	228	158	160	235	239	218	218	209	215	244	256	296	296	282	282	274	274	241	241	332	332	281	281	391	391	173	182	215	229	227	227	13.1419	46.2749
W145	EAH	13.1772	46.2538	247	249	260	264	225	225	182	196	226	226	158	160	235	239	218	218	0	0	260	260	296	296	282	282	259	274	229	241	319	332	289	289	391	391	173	182	223	223	227	227	13.1772	46.2538
W146	EAH	13.2114	46.2679	247	249	256	256	225	225	180	180	228	228	158	160	237	239	212	216	0	0	256	256	292	296	289	289	274	274	229	241	319	332	289	289	391	409	182	182	229	229	227	230	13.2114	46.2679
W147	EAH	13.2193	46.2665	249	249	256	260	225	229	178	182	226	226	160	160	235	239	216	218	0	0	256	256	292	296	289	293	259	266	229	237	332	332	281	289	391	391	173	176	223	229	227	227	13.2193	46.2665
W148	TNV	13.2243	46.2237	247	249	256	260	225	229	182	200	228	228	158	160	231	235	216	216	209	221	256	260	292	296	282	282	253	259	241	241	319	319	289	289	391	391	173	182	215	223	227	230	13.2243	46.2237
W149	TNV	13.2309	46.2082	247	249	256	264	225	225	196	200	226	228	158	158	231	231	204	218	215	221	256	260	296	296	282	282	266	274	241	241	332	332	281	281	391	391	173	182	215	229	227	227	13.2309	46.2082
W150	TNV	13.2812	46.2011	247	249	260	264	225	229	180	180	228	228	160	160	231	231	216	218	209	215	256	256	292	292	289	293	253	253	229	241	332	332	281	289	388	391	173	173	215	223	227	227	13.2812	46.2011
W151	TNV	13.305	46.1899	247	247	256	260	225	229	180	200	226	228	158	160	231	235	218	218	215	215	244	256	296	296	282	282	253	253	241	241	319	319	281	289	391	391	173	173	215	229	227	227	13.305	46.1899
W152	TNV	13.3451	46.1831	247	249	256	260	225	229	196	200	226	226	158	158	235	235	218	218	0	0	244	256	292	292	0	0	253	261	229	229	319	332	281	289	391	391	173	173	215	229	227	227	13.3451	46.1831
W153	TNV	13.3477	46.183	247	249	260	264	225	225	180	196	228	228	158	158	231	235	218	218	209	221	244	244	292	296	0	0	253	274	241	241	332	332	289	289	391	391	173	176	215	223	227	227	13.3477	46.183
W154	TNV	13.3481	46.1838	249	249	256	260	225	229	182	200	226	226	158	160	235	239	216	218	221	221	260	260	292	296	0	0	266	266	241	241	319	332	289	289	391	391	182	182	223	229	227	227	13.3481	46.1838
W155	FP	13.1638	46.1035	249	249	264	264	225	229	180	200	226	226	158	160	231	231	216	216	209	221	260	260	292	296	282	293	259	274	241	241	332	332	281	289	391	391	182	182	223	223	227	227	13.1638	46.1035
W156	FP	12.7703	45.9658	247	249	260	260	225	229	188	200	226	228	158	158	235	239	216	216	215	221	244	260	292	292	0	0	274	276	241	241	332	332	289	289	409	409	182	182	215	229	227	227	12.7703	45.9658
W157	FP	12.7703	45.9658	247	249	256	264	225	225	180	180	226	226	148	148	231	235	216	218	215	221	244	244	292	292	282	282	274	276	241	241	319	332	289	289	391	409	173	182	215	229	227	227	12.7703	45.9658
W158	TNV	13.2296	46.2333	247	249	256	260	225	225	180	196	228	228	160	160	231	235	218	218	0	0	256	260	292	292	282	289	253	274	229	241	319	332	281	289	391	391	173	173	229	229	227	230	13.2296	46.2333
W159	TNV	13.2547	46.2589	247	247	256	260	225	225	180	196	228	228	160	160	231	235	216	218	209	215	256	256	292	292	282	289	266	274	241	241	332	332	289	289	391	391	176	182	223	223	227	227	13.2547	46.2589
W160	TNV	13.2603	46.2664	247	249	260	260	225	229	182	190	226	228	158	158	231	235	216	218	215	215	244	262	292	292	282	289	274	274	241	241	332	332	281	289	391	391	173	182	223	229	227	227	13.2603	46.2664
W161	TNV	13.2731	46.3079	247	249	256	260	225	229	180	200	228	228	160	160	231	239	216	216	0	0	256	256	292	296	0	0	266	274	241	241	319	319	281	289	391	391	182	182	223	229	227	227	13.2731	46.3079
W162	TNV	13.2806	46.3117	247	249	256	260	225	225	196	200	226	228	160	160	235	239	216	216	215	215	244	260	292	296	282	282	274	274	229	241	332	332	281	281	391	391	182	182	229	229	227	227	13.2806	46.3117
W163	TNV	13.3217	46.3047	247	249	260	264	229	229	190	196	228	228	160	160	235	239	216	218	209	215	256	260	296	296	289	293	274	274	241	241	319	332	289	289	391	391	173	176	215	229	227	227	13.3217	46.3047
W164	TNV	13.2675	46.2745	247	249	256	264	229	229	182	200	228	228	160	160	231	239	216	218	221	221	260	260	296	296	282	282	259	259	241	241	319	332	281	289	391	391	182	182	223	229	227	227	13.2675	46.2745
W165	TNV	13.2779	46.2798	247	247	260	260	225	229	180	200	228	228	158	158	231	235	216	218	209	215	256	256	292	296	282	289	253	274	229	241	319	319	281	289	391	391	173	182	215	229	227	227	13.2779	46.2798
W166	TNV	13.2867	46.2578	249	249	260	260	225	229	180	196	226	228	160	160	239	239	216	218	215	215	244	260	292	292	282	293	253	274	229	241	319	332	289	289	391	391	182	182	215	229	227	227	13.2867	46.2578
W167	TNV	13.3081	46.2739	247	249	260	260	225	229	190	200	226	228	156	160	231	239	216	216	221	221	256	256	292	292	282	293	266	274	241	241	319	332	281	289	391	391	173	182	223	223	227	227	13.3081	46.2739
W168	TNV	13.3423	46.2717	247	249	256	260	225	229	200	200	226	226	160	160	231	235	216	218	209	221	256	256	292	292	282	289	253	253	241	241	319	332	281	289	391	391	173	182	223	229	227	227	13.3423	46.2717
W169	TNV	13.2396	46.2193	247	249	256	264	229	229	196	196	226	226	160	160	231	239	216	216	215	215	256	260	292	292	282	293	259	266	241	241	332	332	281	289	391	391	173	176	215	215	227	227	13.2396	46.2193
W170	EAH	13.3145	46.4074	247	249	260	264	225	229	180	196	226	228	158	160	235	239	204	216	209	209	244	260	292	292	282	293	253	259	229	241	319	332	281	289	391	391	173	173	215	223	227	227	13.3145	46.4074
W171	EAH	13.3556	46.4009	247	249	260	260	225	229	180	200	228	228	158	160	231	235	218	218	209	215	260	260	292	292	289	289	0	0	229	241	319	332	289	289	391	391	182	182	215	223	227	230	13.3556	46.4009
W172	EAH	13.37	46.4046	249	249	256	264	225	225	180	196	226	228	158	158	239	239	216	216	209	209	244	244	292	292	282	293	274	274	241	241	319	319	289	289	391	391	182	182	229	229	227	227	13.37	46.4046
W173	EAH	13.4394	46.3962	247	249	260	264	225	229	180	200	226	228	160	160	239	239	216	218	209	209	260	260	296	296	282	293	266	274	241	241	319	319	281	289	391	391	173	182	223	223	227	227	13.4394	46.3962
W174	EAH	13.5712	46.4719	249	249	256	256	225	229	196	196	226	226	158	158	235	239	218	226	215	215	256	260	292	296	282	282	266	266	241	241	319	319	281	289	391	391	173	182	215	229	227	227	13.5712	46.4719
W175	EAH	13.5797	46.4835	249	249	256	260	225	225	196	200	226	228	160	160	235	239	218	218	209	221	260	260	292	292	282	289	266	274	229	241	332	332	281	289	391	391	173	182	215	223	227	227	13.5797	46.4835
W176	WAH	12.9469	46.3547	247	249	260	264	225	229	180	180	226	228	158	158	235	235	204	218	209	221	260	260	292	292	282	289	261	274	241	241	319	332	289	289	391	391	176	182	223	229	227	227	12.9469	46.3547
W177	WAH	12.9297	46.3544	249	249	256	264	225	229	200	200	226	228	158	160	231	235	218	218	0	0	260	260	292	296	282	282	253	253	241	241	319	319	281	289	391	391	173	182	215	229	227	230	12.9297	46.3544
W178	WAH	12.9297	46.3544	247	249	256	264	225	225	180	196	226	228	158	160	235	235	204	218	215	221	256	260	292	296	282	282	259	274	229	241	332	332	289	289	391	391	173	176	215	229	227	227	12.9297	46.3544
W179	WAH	12.9307	46.3532	249	249	256	256	225	229	180	200	226	228	158	160	239	239	216	218	215	215	260	260	292	296	282	282	253	266	229	241	332	332	289	289	391	391	176	182	223	229	227	227	12.9307	46.3532
W180	WAH	12.937	46.3189	247	249	260	264	229	229	180	200	226	228	158	160	231	235	218	218	0	0	256	256	292	296	282	282	253	253	229	241	332	332	281	289	391	391	173	173	223	223	227	230	12.937	46.3189
W181	WAH	12.936	46.3276	247	249	260	264	225	229	182	182	226	228	158	160	231	239	216	218	209	215	256	262	292	296	293	293	261	261	229	241	319	332	281	289	391	391	176	182	223	223	227	227	12.936	46.3276
W182	WAH	12.9318	46.2691	247	249	260	264	229	229	180	196	226	228	160	160	239	239	216	218	215	221	256	260	296	296	289	293	253	274	241	241	332	332	289	289	391	391	173	182	223	223	227	227	12.9318	46.2691
W183	WAH	12.9321	46.2688	247	249	256	264	225	229	182	200	226	228	160	160	239	239	218	218	215	215	244	256	292	296	282	282	274	274	241	241	319	319	281	289	391	391	173	173	215	223	227	227	12.9321	46.2688
W184	WAH	12.9324	46.2692	247	249	256	256	225	229	180	196	228	228	158	158	231	235	216	216	215	221	256	260	296	296	282	293	274	274	229	241	319	332	281	289	391	391	182	182	215	223	227	227	12.9324	46.2692
W185	WAH	12.9323	46.2694	247	249	260	260	225	229	200	200	226	228	158	160	231	235	204	218	209	221	256	260	292	296	282	282	259	274	241	241	319	319	281	289	391	391	173	182	215	229	227	227	12.9323	46.2694
W186	WAH	12.9027	46.2531	249	249	260	264	225	229	196	196	228	228	158	160	231	239	216	218	209	215	256	256	292	292	293	293	274	274	229	241	332	332	281	289	391	391	182	182	215	223	227	227	12.9027	46.2531
W187	WAH	12.7873	46.2768	247	249	256	256	225	229	196	200	226	226	158	160	239	239	204	216	221	221	256	256	292	292	293	293	261	274	229	241	319	332	281	281	391	391	173	182	215	229	227	227	12.7873	46.2768
W188	WAH	12.7852	46.3786	249	249	256	260	229	229	182	200	228	228	160	160	235	239	218	218	215	221	244	256	292	292	282	282	253	253	241	241	319	332	281	289	391	391	173	176	223	223	227	227	12.7852	46.3786
W189	EAH	13.6245	46.512	249	249	260	264	225	229	200	200	228	228	160	160	235	239	216	218	215	221	244	256	292	296	282	282	266	274	241	241	319	332	281	281	391	391	173	173	215	229	227	227	13.6245	46.512
W190	EAH	13.6249	46.5124	249	249	256	260	225	229	200	200	228	228	158	160	239	239	216	216	0	0	256	256	292	292	293	293	266	274	241	241	319	319	281	281	391	391	173	176	215	229	227	227	13.6249	46.5124
W191	WAH	13.0858	46.5399	247	249	256	260	229	229	196	196	226	228	158	160	231	239	216	218	215	221	256	260	292	292	282	282	0	0	229	241	319	332	281	289	391	391	182	182	229	229	227	227	13.0858	46.5399
W192	WAH	13.0754	46.5408	247	249	256	260	225	225	200	200	226	228	158	160	231	231	204	218	215	221	256	260	292	292	282	282	266	274	241	241	319	332	281	289	391	391	173	182	223	229	227	227	13.0754	46.5408
W193	WAH	13.061	46.5409	249	249	256	256	225	225	182	200	226	226	160	160	231	235	204	218	209	215	256	256	292	292	289	289	274	274	241	241	319	332	281	289	391	391	173	182	215	223	227	227	13.061	46.5409
W194	WAH	12.8746	46.4294	249	249	264	264	0	0	200	200	226	228	158	160	235	239	216	218	215	215	256	256	292	296	282	289	259	261	241	241	319	332	281	281	391	391	173	182	223	223	227	227	12.8746	46.4294
W195	WAH	12.8746	46.4295	247	249	256	260	225	229	182	200	226	228	160	160	231	231	216	216	209	209	260	260	292	292	282	282	259	274	241	241	332	332	281	281	391	391	173	173	223	223	227	227	12.8746	46.4295
W196	WAH	12.8748	46.4294	247	249	260	264	225	225	200	200	228	228	158	158	235	239	216	216	209	209	244	256	292	296	282	282	253	274	241	241	332	332	281	289	391	391	173	182	223	229	227	227	12.8748	46.4294
W197	WAH	12.898	46.4211	247	249	256	264	225	229	182	182	226	228	158	158	235	239	216	216	209	209	244	256	292	296	282	290	274	274	241	241	319	332	289	289	391	391	173	182	223	223	227	227	12.898	46.4211
W198	FP	13.0864	46.2539	247	247	256	260	225	225	180	186	226	226	158	160	235	239	218	218	215	215	256	256	292	296	282	290	274	274	241	241	332	332	289	289	391	391	173	173	215	229	227	227	13.0864	46.2539
W199	FP	13.1678	46.1052	249	249	256	260	225	225	180	182	226	228	160	160	231	235	218	226	215	215	256	260	292	296	282	290	266	274	229	241	319	332	281	289	391	391	182	182	229	229	227	227	13.1678	46.1052
W200	WAH	13.1283	46.5404	249	249	256	264	229	229	196	196	228	228	160	160	235	239	216	218	0	0	256	256	292	296	282	290	266	274	229	241	332	332	289	289	391	391	173	173	215	215	227	227	13.1283	46.5404
W201	FP	13.3211	45.8556	247	249	260	260	225	229	180	200	226	226	160	160	231	235	216	216	209	215	256	260	296	296	282	282	274	274	241	241	319	332	289	289	391	391	182	182	223	229	227	227	13.3211	45.8556
W202	FP	13.3561	45.7874	249	249	256	260	229	229	182	182	226	228	160	160	231	239	216	218	209	209	244	262	296	296	282	282	266	274	241	241	319	319	281	281	391	391	173	182	223	229	227	227	13.3561	45.7874
W203	FP	13.417	45.7726	249	249	264	264	225	229	196	200	228	228	160	160	231	239	216	218	209	215	256	256	292	296	290	293	266	266	229	241	319	332	289	289	391	391	173	182	223	229	227	227	13.417	45.7726
W204	FP	13.4127	45.8054	247	249	256	256	225	225	180	180	226	228	160	160	231	235	218	218	209	215	244	256	292	292	0	0	0	0	229	241	319	319	281	289	391	391	173	182	229	229	227	227	13.4127	45.8054
W205	FP	13.4715	45.8189	247	247	260	264	0	0	0	0	226	226	160	160	231	239	218	218	0	0	244	260	292	296	0	0	274	274	241	241	319	319	281	289	388	391	173	182	223	229	227	227	13.4715	45.8189
W206	FP	13.4666	45.8374	247	249	256	260	225	229	200	200	226	228	158	158	235	239	216	218	0	0	260	260	296	296	293	293	259	259	241	241	319	332	281	289	391	391	173	182	223	229	227	227	13.4666	45.8374
W207	FP	13.3397	45.826	249	249	260	260	225	225	180	182	226	228	158	160	231	239	216	218	215	215	260	262	296	296	282	282	266	274	229	241	319	332	281	281	391	391	173	182	223	223	227	227	13.3397	45.826
W208	FP	13.1385	45.8203	249	249	260	260	225	229	180	196	226	228	158	160	231	235	216	218	0	0	256	260	292	292	282	282	0	0	241	241	332	332	281	289	391	391	173	173	223	229	227	227	13.1385	45.8203
W209	FP	13.0891	45.8604	249	249	256	256	225	229	180	200	226	228	160	160	231	235	216	218	0	0	256	260	292	296	293	293	259	274	229	241	332	332	281	289	391	391	182	182	223	223	227	227	13.0891	45.8604
W210	FP	13.0887	45.9276	247	249	256	260	225	229	180	200	226	228	158	160	231	239	216	216	209	215	244	256	292	296	282	293	274	274	229	241	319	332	281	289	391	391	173	182	223	229	227	227	13.0887	45.9276
W211	FP	13.2006	46.0876	249	249	256	256	225	225	196	200	226	228	160	160	231	235	216	218	0	0	256	260	292	296	290	290	259	266	241	241	332	332	281	281	391	391	173	182	223	223	227	227	13.2006	46.0876
W212	WAH	12.7776	46.5226	247	249	256	260	225	225	182	200	228	228	158	160	231	239	216	218	209	209	244	260	292	296	282	282	0	0	241	241	319	319	281	289	391	391	173	182	215	223	227	227	12.7776	46.5226
W213	WAH	12.8055	46.5206	247	249	264	264	225	229	196	200	228	228	158	160	239	239	216	216	209	209	244	258	292	292	282	282	274	274	229	241	332	332	281	289	391	391	173	182	215	223	227	227	12.8055	46.5206
W214	FP	13.2418	46.1335	247	249	256	264	225	225	196	196	228	228	160	160	235	239	216	218	209	209	260	260	292	296	282	290	274	274	241	241	332	332	289	289	391	391	173	173	215	223	227	227	13.2418	46.1335
W215	FP	13.1877	46.1339	249	249	260	264	229	229	200	200	228	228	158	160	231	239	216	216	209	209	256	260	296	296	282	290	274	274	229	241	319	332	289	289	391	391	173	173	229	229	227	230	13.1877	46.1339
W216	FP	12.7501	45.9658	247	249	260	264	229	229	200	200	226	228	158	160	237	239	204	216	209	209	260	262	296	296	282	293	274	274	241	241	319	319	281	281	391	391	182	182	229	229	227	227	12.7501	45.9658
W222	WAH	13.1325	46.5436	247	249	260	260	225	229	0	0	226	228	160	160	231	231	216	218	0	0	256	256	292	292	282	282	266	274	229	241	319	332	281	289	391	391	173	182	223	229	227	227	13.1325	46.5436
W223	WAH	13.0769	46.5393	247	249	256	264	225	225	0	0	0	0	158	160	235	239	216	218	0	0	256	262	292	292	0	0	0	0	229	241	319	332	289	289	391	391	173	182	223	223	227	227	13.0769	46.5393
W224	WAH	12.9326	46.3917	247	249	256	264	225	229	0	0	226	228	160	160	231	235	204	218	0	0	256	256	0	0	282	293	261	274	241	241	319	332	281	289	391	391	173	182	215	215	227	227	12.9326	46.3917
